# Supplementary material
Source: MDPI journal article supplement (https://www.mdpi.com/1999-4907/12/11/1589)
Supplement: s1 [file s1]

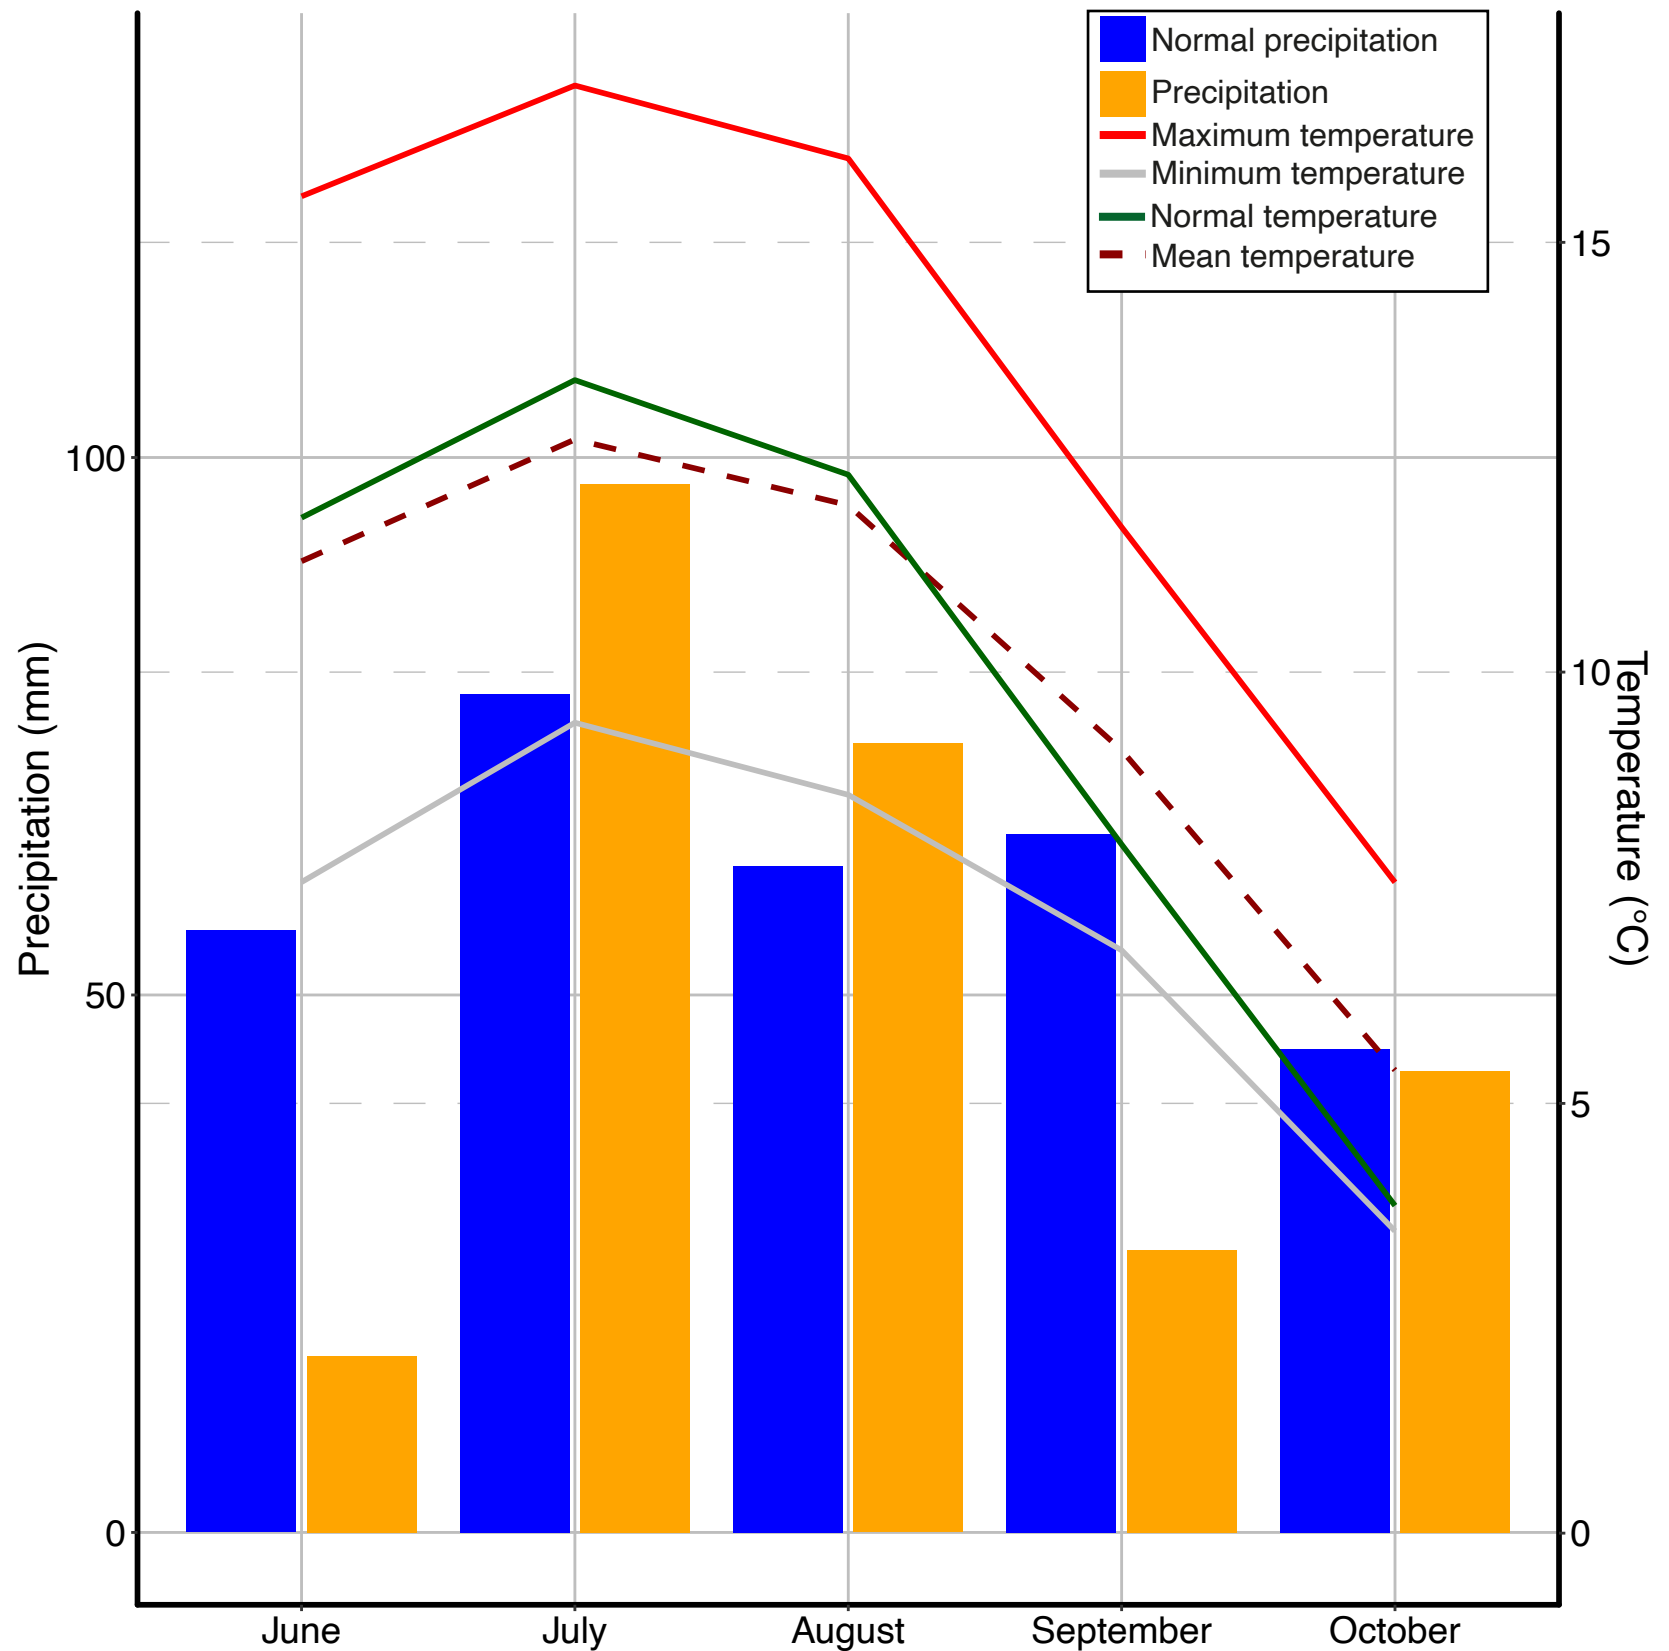

**Figure S2.** Temperature and precipitation. Normal temperature in continuous green line, mean temperature in dashed red line. Maximum in continuous red line and minimum in gray continuous line. Normal precipitation in blue bars, observed precipitation in orange bars. Data was imported from SMHI database from Frösön station, located approximately 150 km west-southwest from the clear-cut. 'Normal' data is calculated with data collected from 1961 to 1990.
