# Supplementary material
Source: MDPI journal article supplement (https://www.mdpi.com/1999-4907/12/11/1589)
Supplement: s1 [file s1]

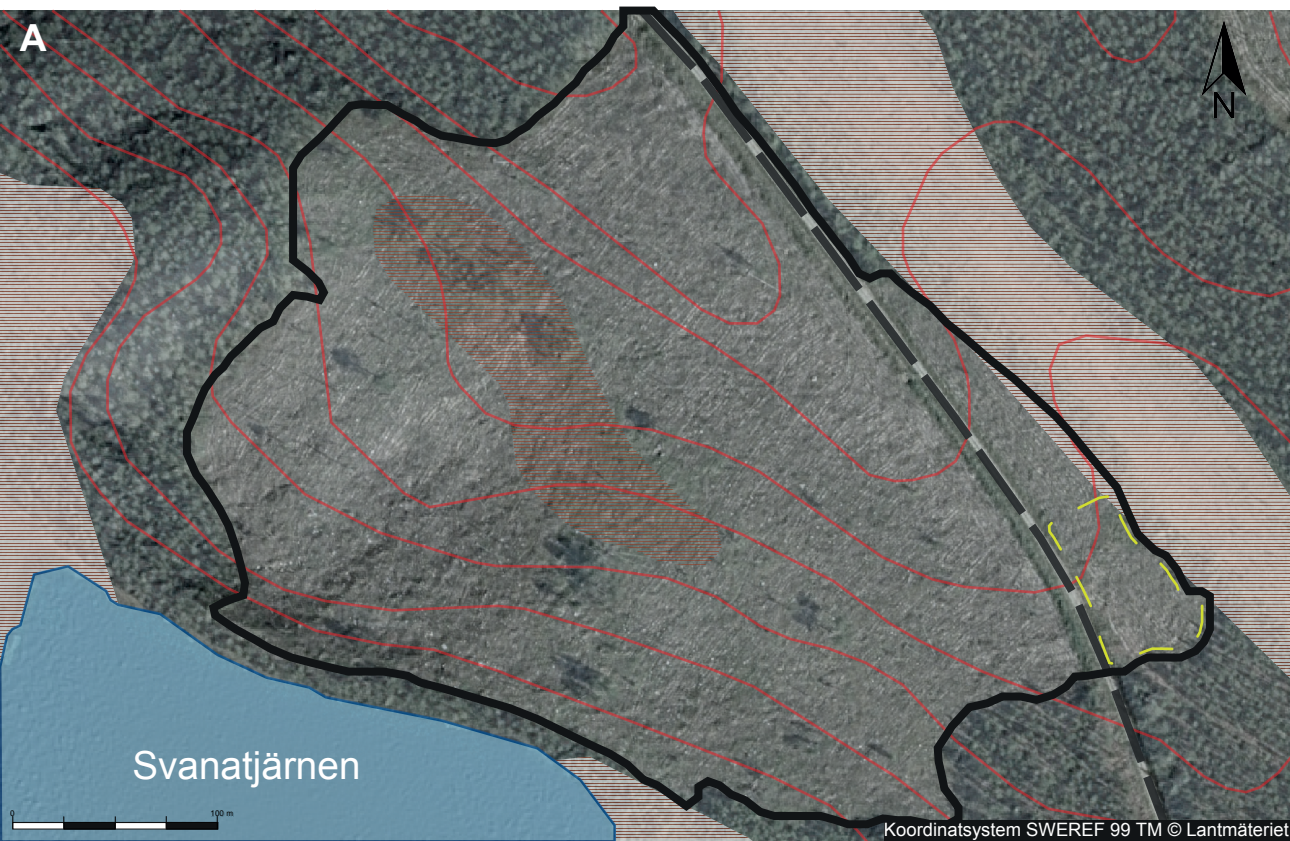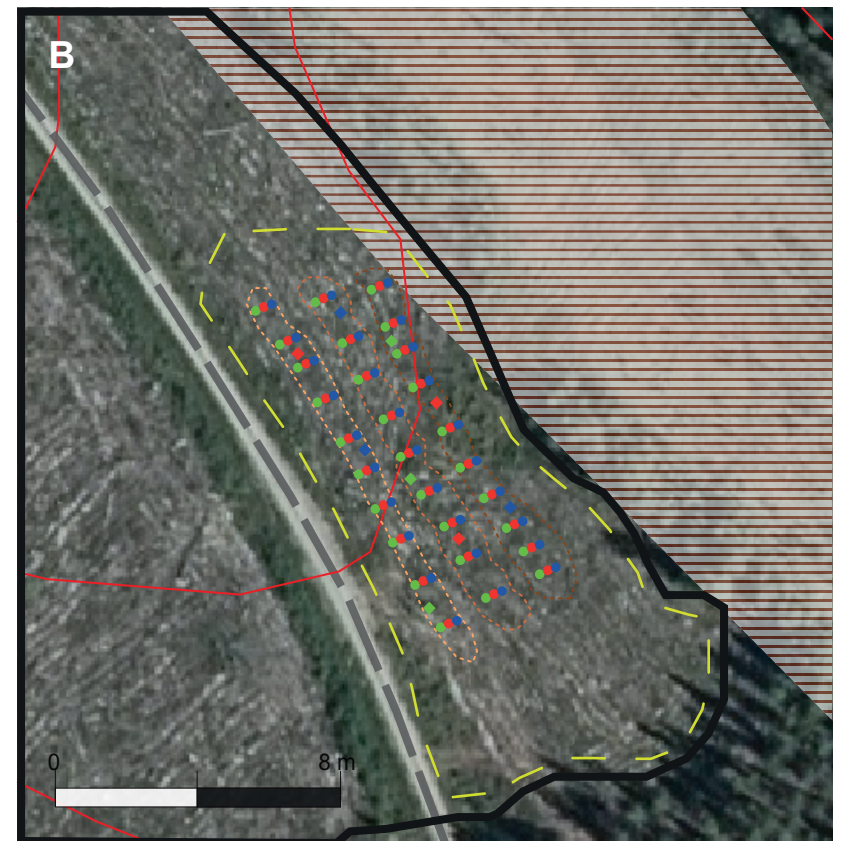

**Figure S1. (A)** Clear-cut field site where the experiment was done, in the Svanatjärnen area. Topographical characteristic of the site, like plateaus, altitude, road and water are presented as lines or colored areas. The complete clear-cut is delimited with a black continuous line and the experimental site is delimited with a yellow dashed line. **(B)** Experimental site detailed view, sub-sites where the SeedPAD's were planted are delimited with a dotted line. Schematic planting are marked with colored dots and scarified soil samples are m; control (green), arginine phosphate (red) and ammonium nitrate (blue). Original maps taken from Lantmäteriet.se on May 2020.
