# Supplementary material
Source: MDPI journal article supplement (https://www.mdpi.com/1999-4907/12/11/1589)
Supplement: s1 [file s1]

Guid  
Trophic mode  
Arginine phosphate  
Ammonium nitrate

| Phylum            | Specie                          | ASV                               |
|-------------------|---------------------------------|-----------------------------------|
| Ascomycota        | <i>Helotiales sp.</i>           | 4532c5215af6bd44d1d4bcd0c6dc95bf6 |
| Ascomycota        | <i>Ascomycota</i>               | 2633a0086c796a930886f643bf72077   |
| Ascomycota        | <i>Chaetothyriales sp.</i>      | 81a8bea9f3c800c9372ea46812044     |
| NA                | <i>Fungi sp.</i>                | c036ca94266a6d52817c3544c119c851  |
| Ascomycota        | <i>Leotiomycetes sp.</i>        | 948f06913092b146c038ad40ace4de10  |
| Ascomycota        | <i>GS34 sp.</i>                 | 128f7ee81f55125e1d9c2729d2825b1b  |
| Ascomycota        | <i>Helotiales sp.</i>           | 916b69706f67141ef084dc00a9c66a83  |
| Basidiomycota     | <i>Solicozozyma terricola</i>   | edc5fca9f3a32b26f7cdca0a04947a44  |
| Basidiomycota     | <i>Auriculariales sp.</i>       | 1422af147f0b087ad23312ee7ae7c223  |
| Basidiomycota     | <i>Serendipitaceae sp.</i>      | d29372def85184cdea6d2d9955922a6   |
| Unidentified      | <i>Fungi sp.</i>                | b980c960162aa533b7c31d3a98688c    |
| Ascomycota        | <i>Gloniaceae sp.</i>           | 4a69700839737097c99a6e0002b3437   |
| Ascomycota        | <i>Clonidiales sp.</i>          | 77142717f6e9a39854cd041ca6372     |
| Basidiomycota     | <i>Atheliales sp.</i>           | b8b90a6d550f41838928d1aaf4935a2   |
| Ascomycota        | <i>Chaetothyriales sp.</i>      | f1dcd6f84557cd5133e1a986bcca998a  |
| Ascomycota        | <i>Sordariomycetes sp.</i>      | 8690f118e84109e8f477351cebd500    |
| Basidiomycota     | <i>Microbotryomycetes sp.</i>   | 7373b6c4125c8645a43286a3d76ab791  |
| Basidiomycota     | <i>Boletales sp.</i>            | 11d019278260bf022c78e7f9e174124   |
| Basidiomycota     | <i>Cantharellales sp.</i>       | 951515f5d8ee55999a2a15a6536c37    |
| Basidiomycota     | <i>Sebacinales sp.</i>          | c68c9b5f5beb6bde2af3d34319175d5   |
| Ascomycota        | <i>Lophodermium pinastri</i>    | 3610d37558af79a32700d0462632ceb1  |
| Ascomycota        | <i>Herpotrichiellaceae sp.</i>  | 75bd56560a1eda75bd5021d66e939b86  |
| Basidiomycota     | <i>Mycena sp.</i>               | 81a9a5775af7f2f20c1db2996b54da95  |
| Ascomycota        | <i>Leptosphaeriaceae sp.</i>    | ead7b1d154212d3a7e458b46f40384a9  |
| Ascomycota        | <i>Exophiala equina</i>         | ab2c2f150b7cd3458cd935000090c7    |
| Ascomycota        | <i>Phomassariaceae sp.</i>      | 5717e26b2c90cd62b53e175fa589392e  |
| Basidiomycota     | <i>Mycena favaalba</i>          | c62072b683ebf44a695fcae69108d     |
| Ascomycota        | <i>Venturiaceae sp.</i>         | 65adb771bf2edb0516adaf147222b6    |
| Basidiomycota     | <i>Agaricales sp.</i>           | 26203d33979e2c2b5754de56b6818719f |
| Basidiomycota     | <i>Atheliales sp.</i>           | afac85bb0d3ab99e0697be8d11c81a    |
| Basidiomycota     | <i>Ceratobasidiaceae sp.</i>    | 00f7ba02e41887d888b0dd6a24a11414  |
| Basidiomycota     | <i>Saltolyma podzolica</i>      | 126b8f9504a19039e09fcb95ad71a8e5  |
| Ascomycota        | <i>Lecanorales sp.</i>          | 98d107aa9b20b37d08ea17e9ed96ee96  |
| Ascomycota        | <i>Oidiodendron sp.</i>         | 8875a8e194de746605ba8bce5a6d14    |
| Mucoromycota      | <i>Unemolopsis sp.</i>          | 67af6fa039f6b277b06bf7a93852348c3 |
| Ascomycota        | <i>Penicillium sp.</i>          | 3b8c23704880b9448ec04cb622122a2d  |
| Mucoromycota      | <i>Unemolopsis sp.</i>          | ae85448de88de10b5be24d9098c1285   |
| Ascomycota        | <i>Hyalosphaeraceae sp.</i>     | 979ad5f49457440eebf67d349cad460c  |
| Ascomycota        | <i>Gyromitra sp.</i>            | d8b2d745556f06b0b254e00d1c91c65   |
| Ascomycota        | <i>Archaeorhizomyces sp.</i>    | 7b1582361448c4a0b726b051097e230   |
| Basidiomycota     | <i>Lycoperdon sp.</i>           | 8272e07092b510024543be27d3d34     |
| Ascomycota        | <i>Sarcocolla globosa</i>       | 34cdcc7744ee614d39326adbed1288a   |
| Ascomycota        | <i>Sistotremastrum suecicum</i> | 3793cd00ee3b2eb0a0472f7377e090a   |
| Basidiomycota     | <i>Hypholoma capnoides</i>      | c367454b266bd4f7771283b9701453e6  |
| Basidiomycota     | <i>Luellia sp.</i>              | 841791c766033632dcb60ea9ea92b7b   |
| Basidiomycota     | <i>Basidioidendron sp.</i>      | 0e0fc7cd763bf7c3deb3fa073b19d333e |
| Mortierellomycota | <i>Mortierella sp.</i>          | 182df1d546b581e3a8f537cbfed15077  |
| Ascomycota        | <i>Pyrenomataceae sp.</i>       | 24c9519e5a7ea83a33cc0e0197e73716  |
| Basidiomycota     | <i>Thelephoraceae sp.</i>       | 855e5fce1422eeceb11151890a0929    |
| Mortierellomycota | <i>Mortierella humilis</i>      | b016d33218cfe10a44eeb5f2c1a24809  |
| Ascomycota        | <i>Helotiaceae sp.</i>          | 740e4c23881473e6c247bea8d2da82    |
| Basidiomycota     | <i>Russula sp.</i>              | 86f65766242f5abf65f28d9d6f5ab3    |
| Basidiomycota     | <i>Piloderma sp.</i>            | 18f9a510c34150c1050dcd9e8d64c     |
| Basidiomycota     | <i>Piloderma sp.</i>            | 6b0503b52da12a9d31cc03eed1f0864   |
| Basidiomycota     | <i>Suillus sp.</i>              | 9e378c2979b2184cd78be40b5a753f    |
| Basidiomycota     | <i>Cortinariaceae sp.</i>       | f56553ca797ef33bf755657528aa816   |
| Basidiomycota     | <i>Inocybe soluta</i>           | b0e22712996784ab0b08b026cd97e2e   |
| Basidiomycota     | <i>Tomentella sp.</i>           | 8f1ef68a06f0b7d34f71035ed448      |
| Basidiomycota     | <i>Lysochora fibrillosa</i>     | 4410f0589046958b4d41caeb7d38300   |
| Basidiomycota     | <i>Amphinema byssoides</i>      | 6a6cbefa8840b71020f655c8578e4     |
| Basidiomycota     | <i>Lactarius sp.</i>            | c4422e4745f8123d2f150ea8a79097be  |

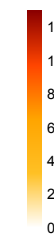

- Unidentified
- Unidentified
- Pathotroph
- Plant Pathogen
- Pathotroph-Saprotroph
- Animal Pathogen-Fungal Parasite-Undefined Saprotroph
- Animal Pathogen-Undefined Saprotroph
- Leaf Saprotroph-Plant Pathogen-Undefined Saprotroph-Wood Saprotroph
- Plant Pathogen-Plant Saprotroph
- Plant Pathogen-Wood Saprotroph
- Pathotroph-Saprotroph-Symbiotroph
- Bryophyte Parasite-Dung Saprotroph-Ectomycorrhizal-Fungal Parasite
- Leaf Saprotroph-Plant Parasite-Undefined Saprotroph-Wood Saprotroph
- Ectomycorrhizal-Lichen Parasite-Lichenized-Plant Pathogen
- Endophyte-Plant Pathogen-Undefined Saprotroph
- Endomycorrhizal-Plant Pathogen-Undefined Saprotroph
- Fungal Parasite-Undefined Saprotroph
- Pathotroph-Symbiotroph
- Ericoid Mycorrhizal
- Lichen Parasite-Lichenized
- Saprotroph
- Plant Saprotroph-Wood Saprotroph
- Soil Saprotroph
- Undefined Saprotroph
- Saprotroph-Symbiotroph
- Dung Saprotroph-Ectomycorrhizal-Soil Saprotroph-Wood Saprotroph
- Ectomycorrhizal-Fungal Parasite-Plant Pathogen-Wood Saprotroph
- Ectomycorrhizal-Undefined Saprotroph
- Endophyte-Litter Saprotroph-Soil Saprotroph-Undefined Saprotroph
- Symbiotroph
- Ectomycorrhizal
